# Supplementary material for: Estimating the age of Heliconius butterflies from calibrated photographs
Source: PeerJ. 2017 Sep 27;5:e3821. doi: 10.7717/peerj.3821 (PMC5622606; doi:10.7717/peerj.3821)
Supplement: Data S1 — Individual collection number, colour category, days after emergence, sex, and “a” value from photographs. [file peerj-05-3821-s001.xlsx]

## Sheet: Plan1
	collection
	indiv #	colour	days	sex	a_value
	6086	red	18	M	15.2903
	6175	faded red	35	F	17.1213
	6176	faded red	36	F	15.39
	6178	crimson	1	M	24.1162
	6179	crimson	5	M	23.3758
	6180	red	19	M	20.4231
	6193	red	10	M	19.8356
	6197	red	8	F	21.8198
	6199	red	30	M	20.8658
	6201	red	40	F	19.2536
	6203	red	10	F	19.4418
	6204	red	9	M	19.4686
	6208	red	13	M	22.2338
	6209	red	6	F	20.7574
	6210	crimson	5	M	25.6491
	6212	red	22	M	19.7961
	6213	crimson	3	M	21.6557
	6214	red	6	F	21.3547
	6216	red	6	F	25.2382
	6219	faded red	33	M	19.4919
	6220	red	11	F	23.8487
	6222	red	13	F	23.2325
	6224	faded red	28	M	17.8175
	6225	red	15	M	18.6533
	6226	faded red	36	F	15.9509
	6231	faded red	35	F	19.4703
	6232	faded red	33	F	16.1017
	6233	crimson	9	F	24.072
	6234	red	18	F	20.0615
	6235	red	6	F	20.357
	6240	red	1	F	21.9963
	6243	red	33	M	19.401
	6254	red	5	F	22.2117
	6255	crimson	4	F	21.7511
	6257	crimson	6	F	19.0551
	6262	red	38	F	15.9156
	6263	red	36	F	17.3871
	6264	red	34	F	16.4435
	6265	red	29	M	21.7175
	6266	red	5	M	23.7397
	6268	red	4	F	19.7713
	6271	red	3	F	22.7368
	6273	red	11	F	19.5724
	6274	red	3	F	20.9752
	6275	red	4	F	22.716
	6296	red	4	F	22.6502
	6297	red	15	F	17.2914
	6300	red	5	F	23.2265
	6301	red	12	F	21.412
	6303	crimson	1	M	22.5581
	6304	crimson	2	F	21.7787
	6321	red	6	F	24.4024
	6325	red	6	F	21.699
	6326	red	3	F	22.6262
	6328	red	6	F	22.5957
